# Supplementary material for: Confocal Microscopy for Diagnosis and Management of Cutaneous Malignancies: Clinical Impacts and Innovation
Source: MDPI journal article supplement (doi:10.3390/diagnostics13050854), 2023-02-23
Supplement: s1 [file s1]

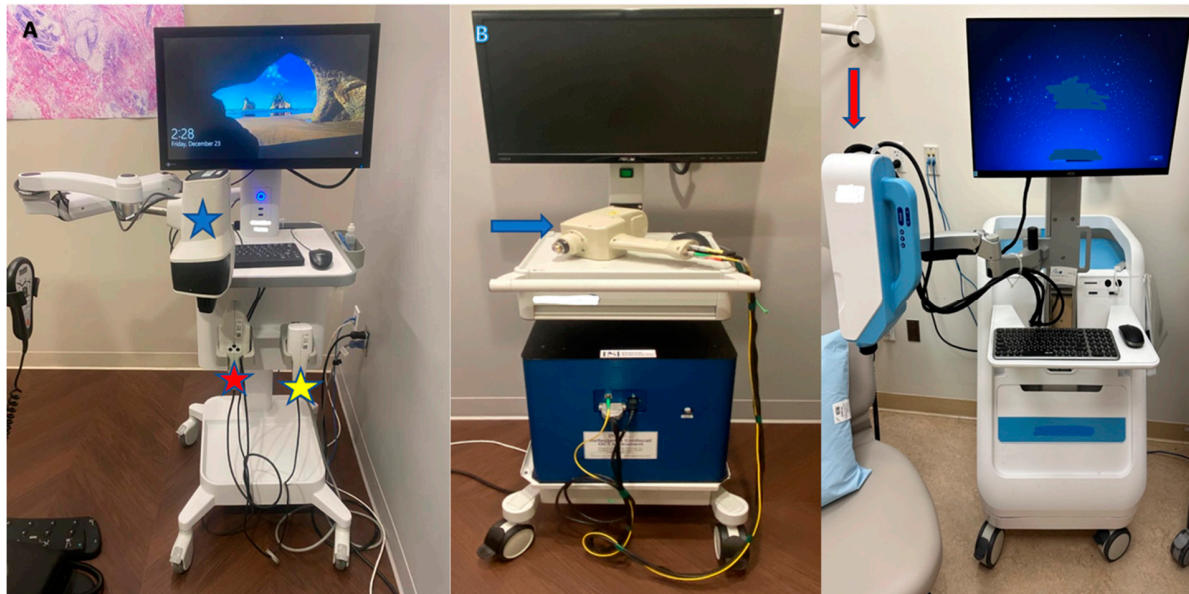

**Supplemental Figure S1:** Photos of in vivo microscopes for used skin imaging. (A) A reflectance confocal microscope mounted on a portable cart equipped with an arm mounted arm (blue star) and a handheld (red star) device and a dermatoscope (yellow star). (B) A combined RCM-OCT device with a handheld probe to acquire both OCT and RCM images, simultaneously (blue arrow). (C) A high-resolution Full-Field OCT (FF-OCT) microscope equipped an arm mounted arm piece for imaging (red arrow). Images courtesy: Ms. Ucalene Harris and Ms. Rozina Zeidan, MSKCC.

**Supplementary Table S1:** Reflectance confocal microscopy (RCM) terms of the structures and their histopathological correlates in common skin malignancies.

| RCM Terms of the Structures                      | Histopathological Correlates                                                                                 |
|--------------------------------------------------|--------------------------------------------------------------------------------------------------------------|
| <b>Basal Cell Carcinoma (BCC)<sup>a</sup></b>    |                                                                                                              |
| Streaming of the epidermis                       | Probably corresponds to the horizontal section of the uppermost part of a tumor nest or cord with palisading |
| Epidermal shadow                                 | Probably an optical effect of the <i>en face</i> view of a tumor nest                                        |
| Tumor island/nodules                             | Nests of basaloid tumor cells at the dermo-epidermal junction or in the superficial dermis                   |
| Peripheral palisading                            | Parallel arrangement of the basaloid tumor cells at the periphery of the tumor nests                         |
| Clefting                                         | Space between the tumor parenchyma and the surrounding stroma                                                |
| Cord-like structures/ Basaloid cords and nodules | Nests of tumor cells connected to the dermo-epidermal junction                                               |

|                                                                                             |                                                                                                                                                                      |
|---------------------------------------------------------------------------------------------|----------------------------------------------------------------------------------------------------------------------------------------------------------------------|
| Dark silhouettes                                                                            | Nests of basaloid cells in the dermis, not clearly visible due to poor resolution at deeper depth (after 150–200 µm). Mostly seen in the infiltrative subtype of BCC |
| Increased vascularity                                                                       | Increased number of dilated blood vessels running parallel to the epidermal surface                                                                                  |
| Peritumoral collagen reaction                                                               | Reaction of collagen to the dermal tumor nests                                                                                                                       |
| <b>Squamous Cell Carcinoma (SCC)<sup>a</sup></b>                                            |                                                                                                                                                                      |
| Hyperkeratosis                                                                              | Hyperkeratosis                                                                                                                                                       |
| Atypical honeycomb pattern                                                                  | Alteration in nuclear and cellular size and shape of epidermal keratinocytes                                                                                         |
| Disarranged epidermal pattern                                                               | Severe alteration in nuclear and cellular size and shape of epidermal keratinocytes                                                                                  |
| Targetoid cells                                                                             | Dyskeratotic keratinocytes within the epidermis                                                                                                                      |
| Keratin pearl                                                                               | Keratinization                                                                                                                                                       |
| Buttonhole vessels (Round blood vessels traversing the dermal papilla)                      | Aberrant neovascularization                                                                                                                                          |
| <b>Melanoma<sup>b</sup></b>                                                                 |                                                                                                                                                                      |
| Pagetoid cells                                                                              | Presence of atypical melanocytes in supra-basal layers of the epidermis                                                                                              |
| Polymorphic melanocytic cells (Bright dendrites/Dendritic/Round cells within the epidermis) | Presence of melanocytes in supra-basal layers of the epidermis.                                                                                                      |
| Follicular localization of pagetoid cells and/or atypical cells                             | Dendritic projections of Langerhans cells or melanocytes atypical melanocytes in adnexal structures. Typical of lentigo maligna-type melanoma                        |
| Non-edged papillae                                                                          | Disfiguration of the rete ridges due to atypical melanocyte proliferation out of the sides and the tip of rete ridges                                                |
| Atypical cells at the dermo-epidermal junction                                              | Proliferation of atypical melanocytes as an individual unit along the dermo-epidermal junction                                                                       |
| Junctional nests/ Junctional thickening                                                     | Junctional nested proliferation of melanocytes                                                                                                                       |
| Sheet-like structures                                                                       | Florid lentiginous proliferation of atypical melanocytes along the dermo-epidermal junction                                                                          |
| Dense and sparse nests                                                                      | Irregular or discohesive nests of melanocytes                                                                                                                        |
| Cerebriform nest                                                                            | Nodular aggregates of atypical melanocytes in melanoma with dermal component                                                                                         |
| Plump cells                                                                                 | Melanophages                                                                                                                                                         |

|                                            |                                                                                           |
|--------------------------------------------|-------------------------------------------------------------------------------------------|
|                                            |                                                                                           |
| Patterns seen at lower-power magnification |                                                                                           |
| Ringed pattern                             | Lentiginous or small-nested junctional proliferation of melanocytes                       |
| Meshwork pattern                           | Nested junctional proliferation of melanocytes with bridging between adjacent rete ridges |
| Clod pattern                               | Dermal nested proliferation of melanocytes                                                |

**Notes:** <sup>a</sup> Navarrete-Dechent C, DeRosa AP, Longo C, Liopyris K, Oliviero M, Rabinovitz H, Marghoob AA, Halpern AC, Pellacani G, Scope A, Jain M. Reflectance confocal microscopy terminology glossary for nonmelanocytic skin lesions: A systematic review. *J Am Acad Dermatol*. 2019 May;80(5):1414-1427.e3. doi: 10.1016/j.jaad.2018.12.007. Epub 2018 Dec 8. PMID: 30529706; PMCID: PMC6830574. Also, this refers to the reference (25) in main text.

<sup>b</sup> Navarrete-Dechent C, Liopyris K, Monnier J, Aleissa S, Boyce LM, Longo C, Oliviero M, Rabinovitz H, Marghoob AA, Halpern AC, Pellacani G, Scope A, Jain M. Reflectance confocal microscopy terminology glossary for melanocytic skin lesions: A systematic review. *J Am Acad Dermatol*. 2021 Jan;84(1):102-119. doi: 10.1016/j.jaad.2020.05.097. Epub 2020 May 23. PMID: 32454102; PMCID: PMC8387955. Also, this refers to the reference (24) in main text.
